# Supplementary material for: Tunable orientation of two-dimensional assembled Au octahedron superlattices in polymer films as flexible SERS substrates
Source: Royal Society of Chemistry journal article supplement (doi:10.1039/d2nr07165g), 2023-01-01
Supplement: d2nr07165g1.pdf [file d2nr07165g1.pdf]

**Supporting information**

**Tunable orientation of two-dimensional assembled Au octahedron  
superlattice in polymer film as flexible SERS substrates**

Xiang-Dong Tian<sup>a,b</sup> and Yun Zhang <sup>\*a,b</sup>

- a. State Key Laboratory of Structural Chemistry, Fujian Institute of Research on the Structure of Matter, Chinese Academy of Sciences, Fuzhou 350002, China

E-mail: zhangy@fjirsm.ac.cn

- b. Xiamen Key Laboratory of Rare Earth Photoelectric Functional Materials, Xiamen Institute of Rare Earth Materials, Haixi Institute, Chinese Academy of Sciences, Xiamen 361021, China

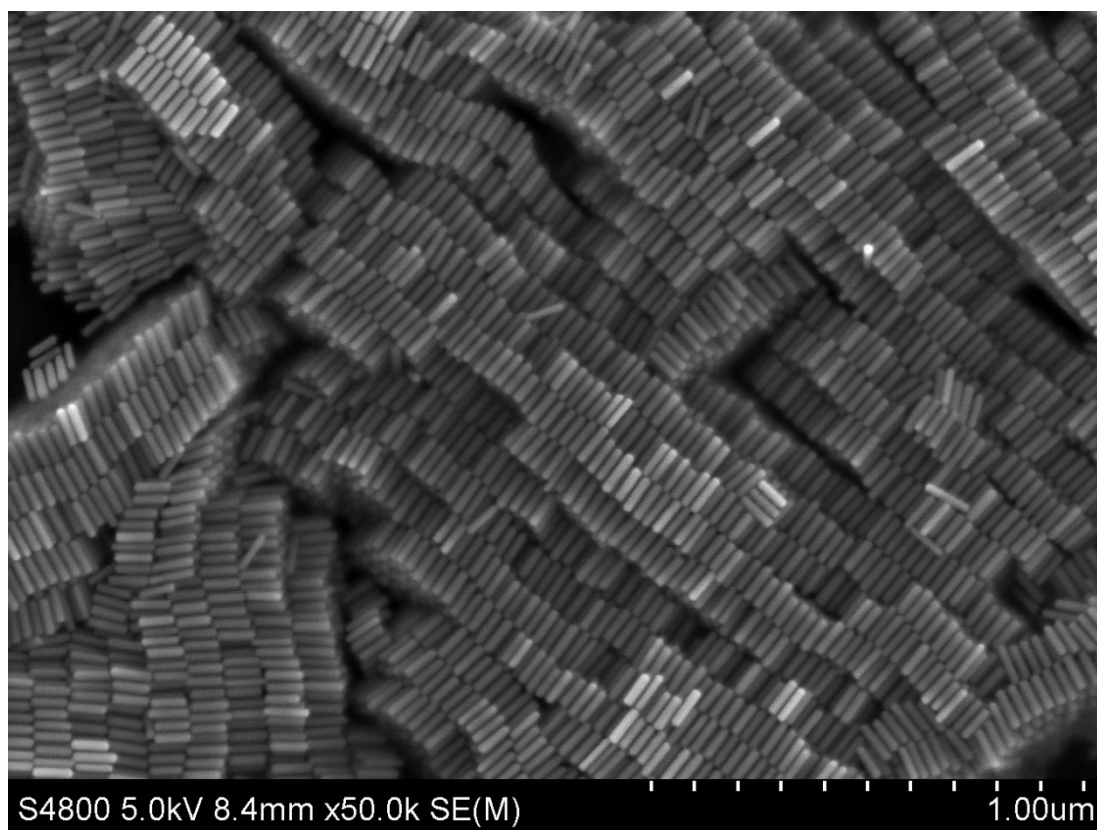

**Figure S1.** Au nanorods

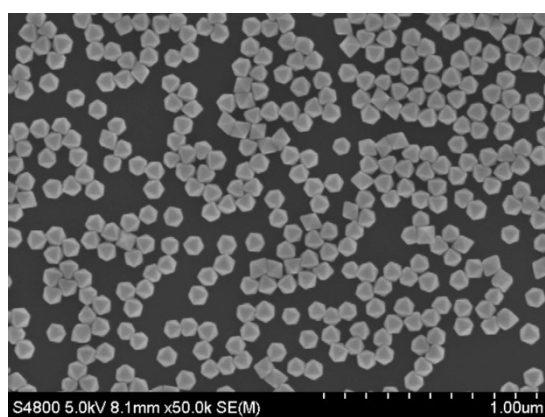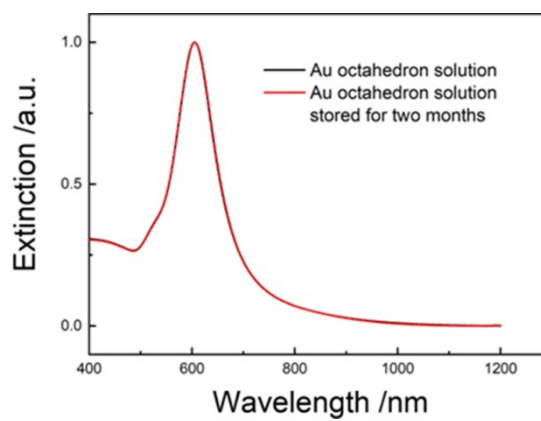

**Figure S2.** Au octahedrons and the UV-Vis-NIR spectra of Au octahedron in ethanol

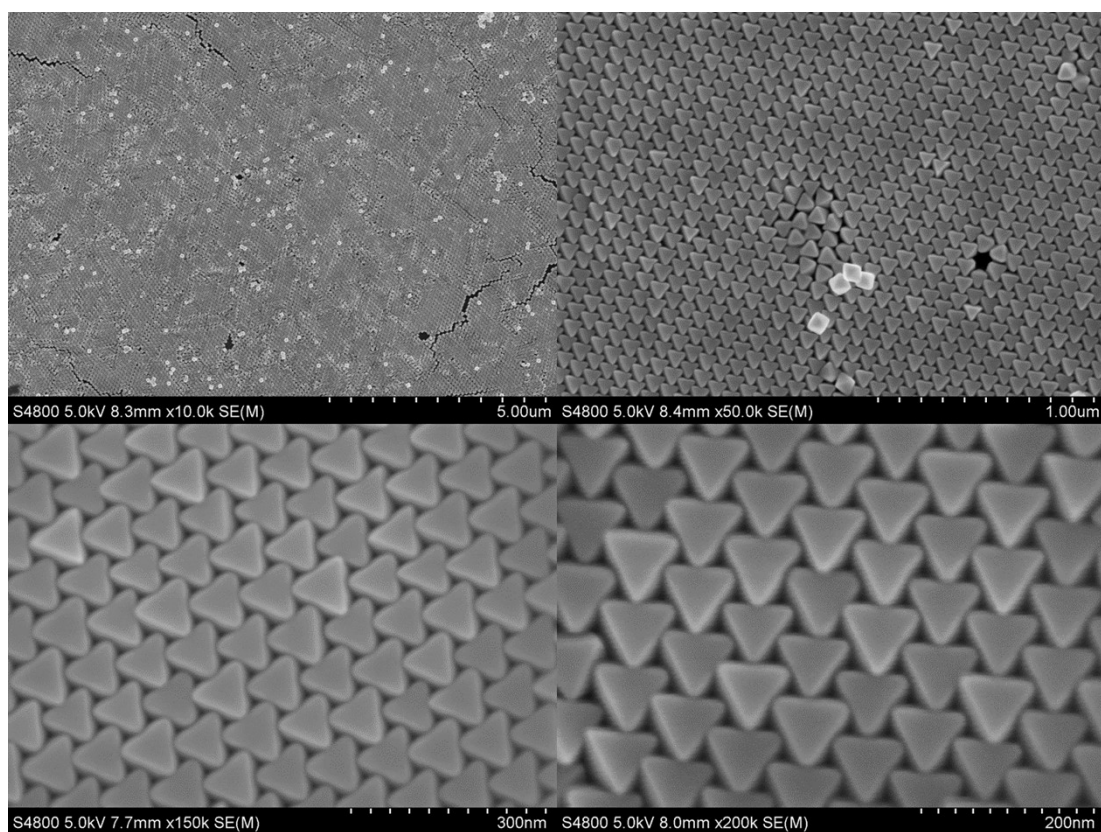

**Figure S3.** 2D superlattice of Au octahedrons with face-up orientation

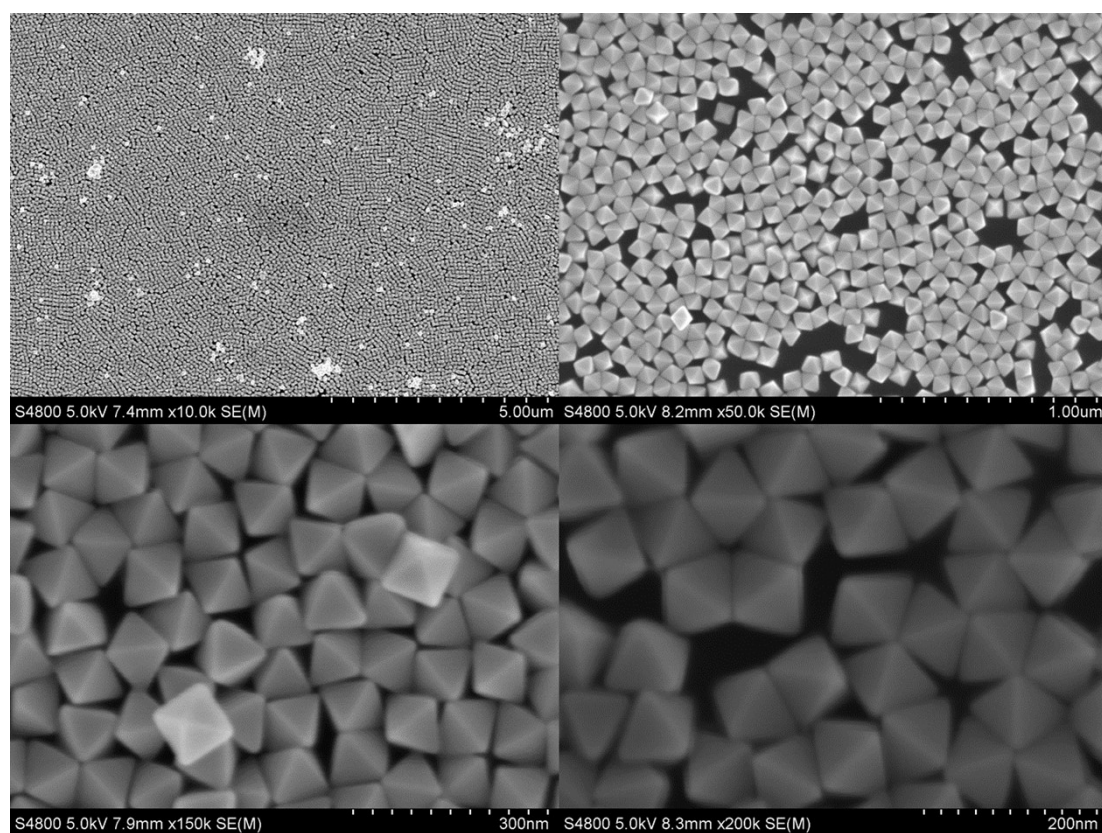

**Figure S4.** 2D superlattice of Au octahedrons with edge-up orientation

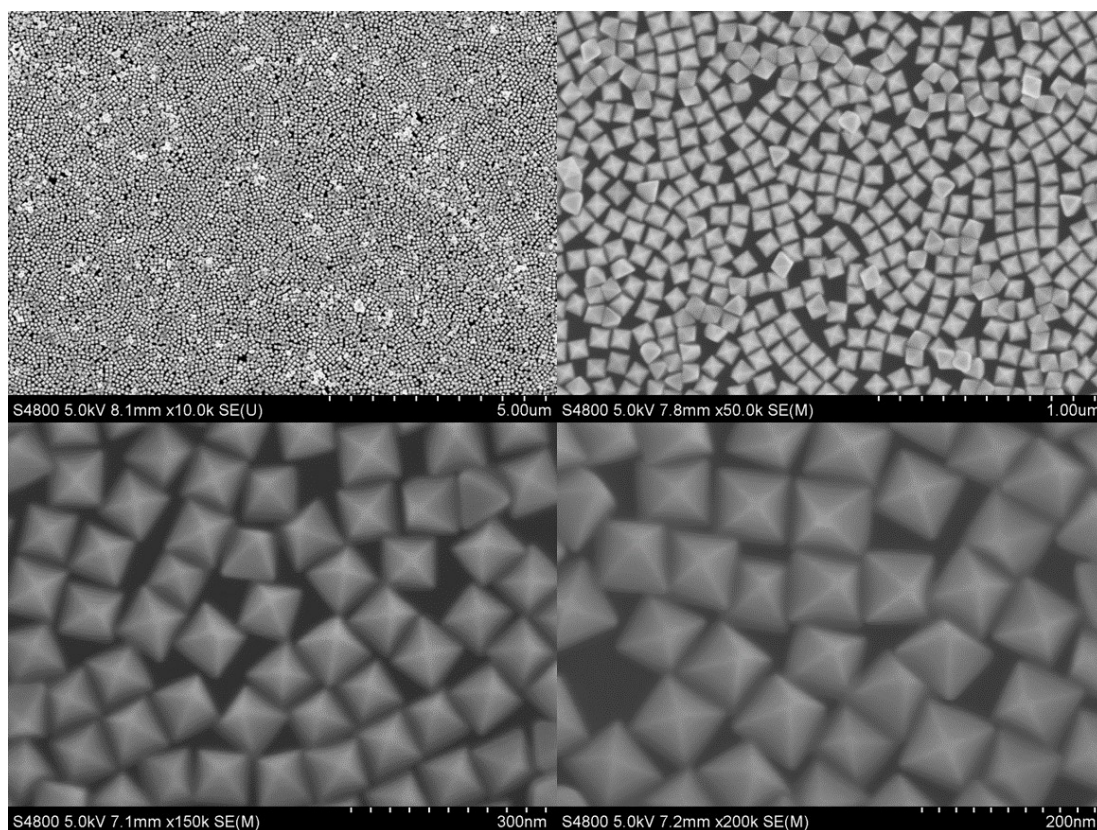

**Figure S5.** 2D superlattice of Au octahedrons with vertex-up orientation

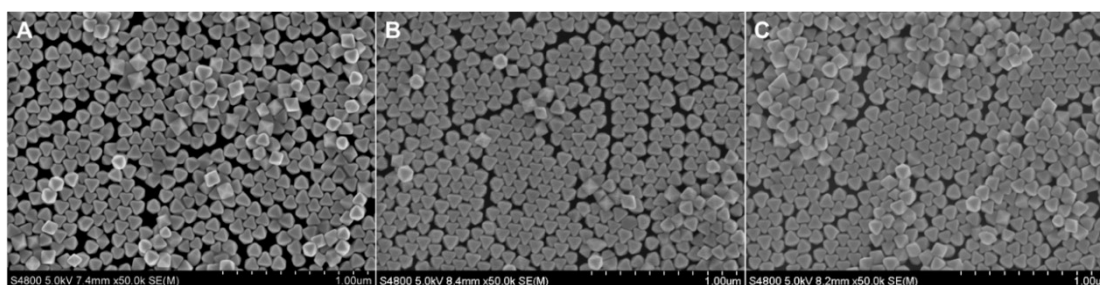

**Figure S6.** The assembly of Au octahedron monolayer without adding the SEBS. (A) PVP concentration is 5 ng/mL. (B) PVP concentration is 22 ng/mL, (C) PVP concentration is 7 ng/mL and 5  $\mu$ L of 20  $\mu$ M DDT/ toluene solution was added to the assembly mixture.

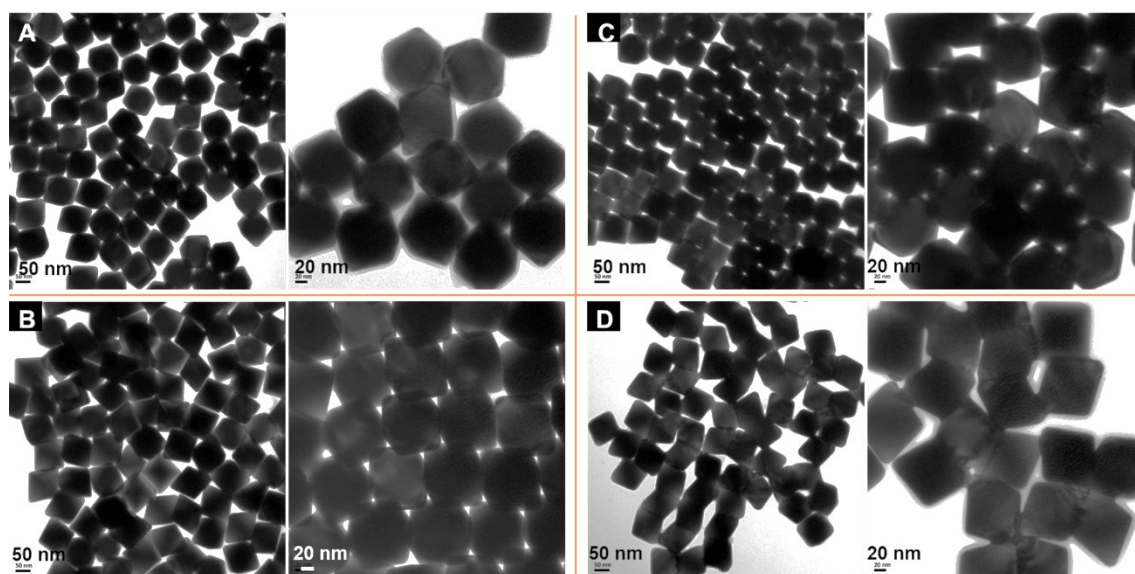

**Figure S7.** TEM characterization of the assembly nanostructures. (A) the assembly nanostructures without the post-treatment. (B-D) with the post-treatment, (B) face-up, (C) vertex-up, (D) edge-up.

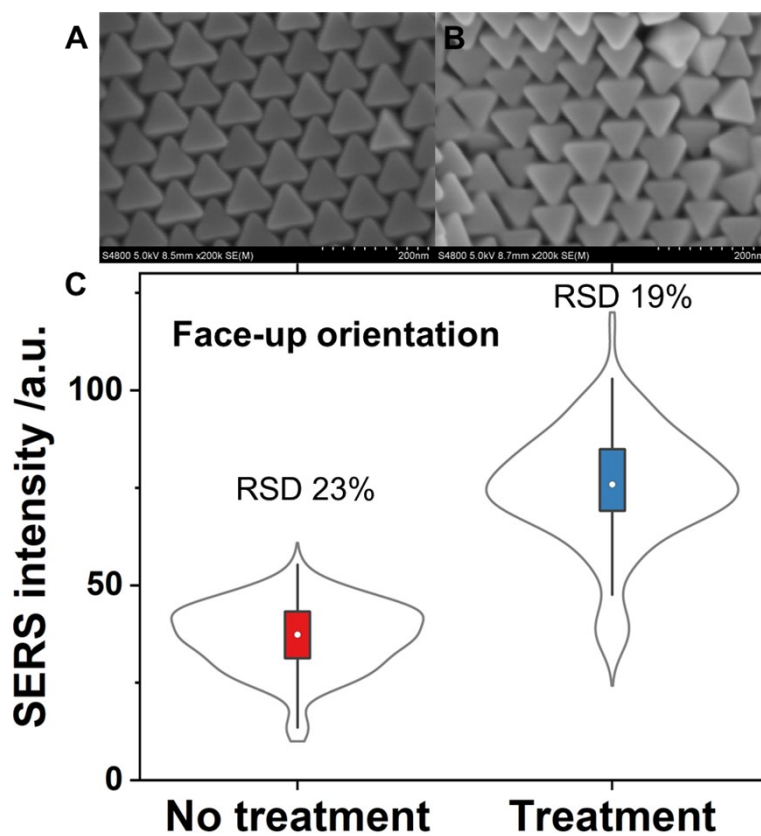

**Figure S8.** The treatment of the Au octahedron- SEBS nanomembrane by sodium borohydride aqueous solution. SEM of the substrate before (A) and after (B) the treatment. (C) The effect of the treatment on the SERS performance.

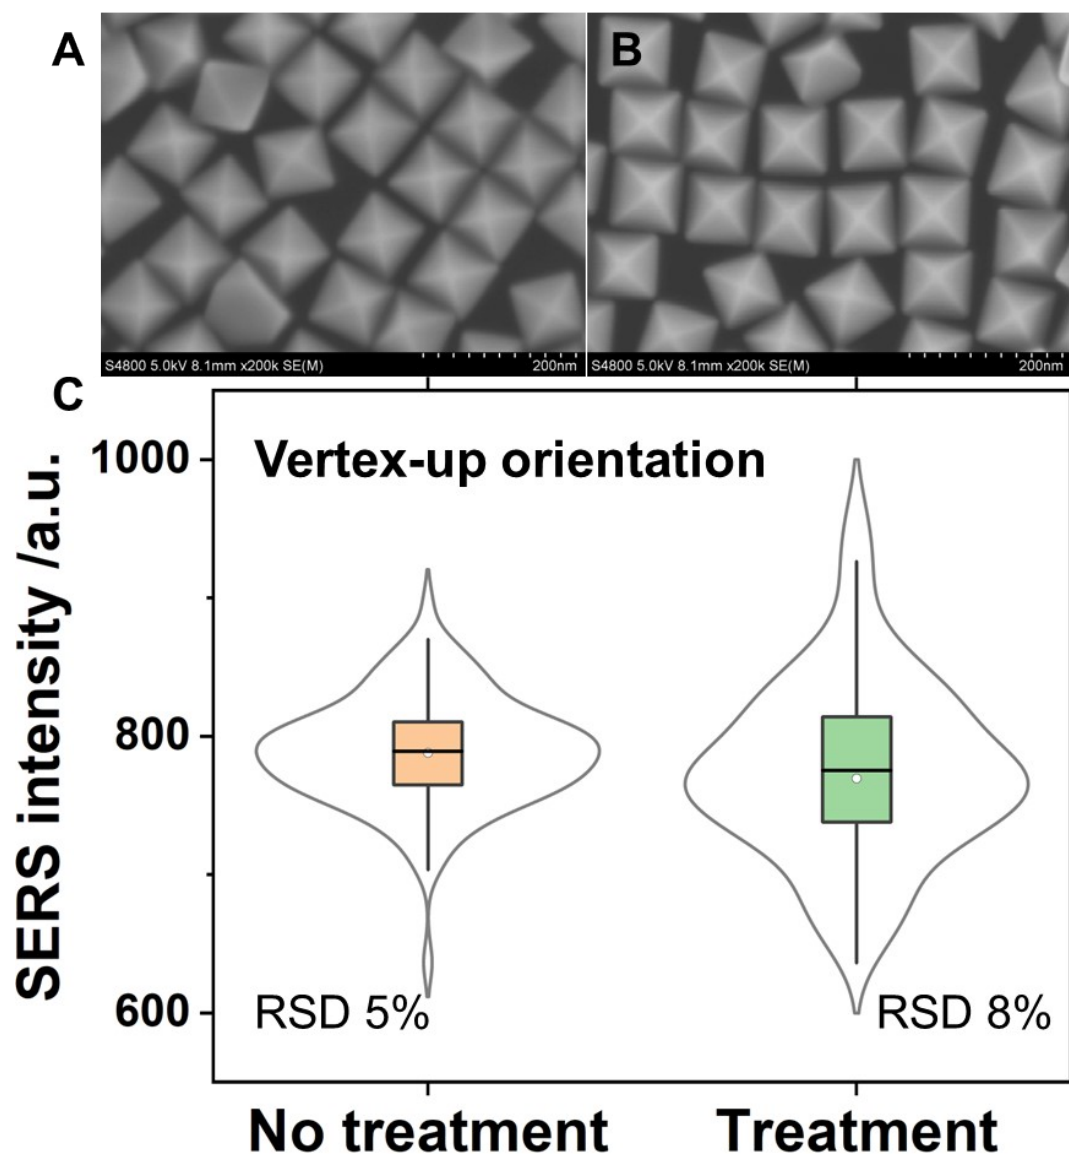

**Figure S9.** The treatment of the Au octahedron- SEBS nanomembrane by sodium borohydride aqueous solution. SEM of the substrate before (A) and after (B) the treatment. (C) The effect of the treatment on the SERS performance.
